# Supplementary material
Source: MDPI journal article supplement (https://www.mdpi.com/2504-3900/79/1/13)
Supplement: s1 [file s1]

## Supplementary 1:

| Compound Name                     | IC50 Value (μM) | Reference                                               |
|-----------------------------------|-----------------|---------------------------------------------------------|
| 1. Luteolin                       | 14.44           | (Herath, Takano-Ishikawa, & Yamaki, 2003)               |
| 2. Genistein                      | 65.08           | (Herath et al., 2003)                                   |
| 3. Apigenin                       | 3.27            | (Nicholas et al., 2007)                                 |
| 4. Kaempferol                     | 3.99            | (Kim et al., 2007)                                      |
| 5. Quercetin                      | 3.11            | (Nair et al., 2006)                                     |
| 6. Myricetin                      | 3.84            | (Herath et al., 2003; Rathee et al., 2009)              |
| 7. Naringenin                     | 14.41           | (Herath et al., 2003; Wilcox, Borradaile, & Huff, 1999) |
| 8. Phloretin                      | 3.00            | (Lommen, Godejohann, Venema, Hollman, & Spraul, 2000)   |
| 9. Butein                         | 6.29            | (Cheng, Kuo, Chan, Ko, & Teng, 1998)                    |
| 10. Cyanidin                      | 36.91           | (Chandra, Rana, & Li, 2001)                             |
| 11. Eriodictyol                   | 50              | (Wang, Li, Ho, Peng, & HO, 1998)                        |
| 12. Hesperetin                    | 50              | (Swatsitang, Tucker, Robards, & Jardine, 2000)          |
| 13. Wogonin                       | 1-50            | (Lee et al., 2003)                                      |
| 14. Morin                         | 1.5             | (Arima & Danno, 2002)                                   |
| 15. Amoradycin                    | 28.5            | (Cho et al., 2000)                                      |
| 16. Velutin                       | 2.5             | (Xie et al., 2012)                                      |
| 17. Thymoquinone                  | 25-75           | (Sethi, Ahn, & Aggarwal, 2008)                          |
| 18. Paeoniflorin                  | 6.1-200         | (M. Wu & Gu, 2009)                                      |
| 19. Paeonol                       | 6.1-200         | (M. Wu & Gu, 2009)                                      |
| 20. Scopoletin                    | 10              | (Moon et al., 2007)                                     |
| 21. Capsaicin                     | 50              | (Park et al., 2004)                                     |
| 22. Curcumin                      | 2.5             | (Jagetia & Aggarwal, 2007)                              |
| 23. Yangonin                      | 40              | (Hashimoto et al., 2003)                                |
| 24. Berberine                     | 5               | (Chen et al., 2008)                                     |
| 25. Ergosterol peroxide           | 15-60           | (Kobori, Yoshida, Ohnishi-Kameyama, & Shinmoto, 2007)   |
| 26. Eudesmin                      | 51.3            | (Chae et al., 1998)                                     |
| 27. Magnolin                      | 12.5            | (Chae et al., 1998)                                     |
| 28. Magnosalin                    | 5.9             | (Ryu, Son, Lee, & Sohn, 2002)                           |
| 29. Savinin                       | 31.9            | (Cho et al., 2001)                                      |
| 30. Arctigenin                    | 3.88            | (Zhao, Wang, & Liu, 2009)                               |
| 31. Honokiol                      | 15              | (F. Wu et al., 2011)                                    |
| 32. Acanthoic acid                | 5.46            | (Kang et al., 1996)                                     |
| 33. Silybin                       | 140.3           | (Cho et al., 2000)                                      |
| 34. Catechin                      | 3.11            | (Herath et al., 2003)                                   |
| 35. Lirioresinol-B dimethyl ether | 12.5            | (Chae et al., 1998)                                     |
| 36. Geraniin                      | 43              | (OKABE et al., 2001)                                    |
| 37. Corilagin                     | 76              | (OKABE et al., 2001)                                    |
