# Supplementary material
Source: MDPI journal article supplement (https://www.mdpi.com/2504-3900/79/1/13)
Supplement: s1 [file s1]

## Supplementary file 2:

**Table S1.** Results of Hydrophobic interactions of Paeoniflorin with the active site residues of TNF  $\alpha$ .

| Index | Residue | AA  | Distance | Ligand Atom | Protein Atom |
|-------|---------|-----|----------|-------------|--------------|
| 1     | 57A     | LEU | 3.89     | 4325        | 653          |
| 2     | 57A     | LEU | 3.37     | 4326        | 655          |
| 3     | 59A     | TYR | 3.50     | 4325        | 694          |
| 4     | 59B     | TYR | 3.93     | 4307        | 2846         |
| 5     | 119A    | TYR | 3.44     | 4314        | 1471         |
| 6     | 119B    | TYR | 3.72     | 4312        | 3691         |

**Table S2.** Hydrogen bonding interactions of Paeoniflorin with the active site residues of TNF  $\alpha$ .

| Index | Residue | AA  | Distance H-A | Distance D-A | Donor Angle | Protein donor? | Sidechain | Donor Atom | Acceptor Atom |
|-------|---------|-----|--------------|--------------|-------------|----------------|-----------|------------|---------------|
| 1     | 60A     | SER | 1.94         | 2.89         | 171.41      | ✗              | ✗         | 4304 [O3]  | 711 [O2]      |
| 2     | 120A    | LEU | 3.21         | 4.00         | 136.19      | ✓              | ✗         | 1488 [Nam] | 4304 [O3]     |
| 3     | 120B    | LEU | 1.83         | 2.73         | 155.17      | ✗              | ✗         | 4297 [O3]  | 3709 [O2]     |
| 4     | 151A    | TYR | 2.10         | 2.98         | 151.69      | ✗              | ✓         | 4303 [O3]  | 1970 [O3]     |

**Table S3.** Hydrophobic interactions patterns of Amoradycin with the active site residues of TNF- $\alpha$ .

| Index | Residue | AA  | Distance | Ligand Atom | Protein Atom |
|-------|---------|-----|----------|-------------|--------------|
| 1     | 57B     | LEU | 3.46     | 4323        | 2811         |
| 2     | 59B     | TYR | 3.55     | 4302        | 2848         |
| 3     | 119A    | TYR | 3.00     | 4324        | 1474         |
| 4     | 119B    | TYR | 3.30     | 4315        | 3689         |
| 5     | 123B    | VAL | 3.87     | 4323        | 3745         |

**Table S4.** Hydrogen bonding interactions of Amoradicin with the active site residues of TNF alpha.

| Index | Residue | AA  | Distance<br>H-A | Distance<br>D-A | Donor<br>Angle | Protein<br>donor? | Sidechain | Donor<br>Atom | Acceptor<br>Atom |
|-------|---------|-----|-----------------|-----------------|----------------|-------------------|-----------|---------------|------------------|
| 1     | 58A     | ILE | 2.60            | 3.25            | 121.70         | ✓                 | ✗         | 668<br>[Nam]  | 4299 [O3]        |
| 2     | 60B     | SER | 2.78            | 3.32            | 116.37         | ✗                 | ✗         | 4296<br>[O3]  | 2866 [O2]        |
| 3     | 60B     | SER | 3.63            | 4.04            | 106.63         | ✓                 | ✗         | 2863<br>[Nam] | 4297 [O2]        |
| 4     | 119A    | TYR | 1.98            | 2.92            | 163.55         | ✓                 | ✓         | 1478<br>[O3]  | 4294 [O3]        |
| 5     | 120B    | LEU | 2.74            | 3.13            | 102.79         | ✓                 | ✗         | 3706<br>[Nam] | 4296 [O3]        |
| 6     | 122A    | GLY | 3.11            | 3.64            | 113.39         | ✓                 | ✗         | 1514<br>[Nam] | 4299 [O3]        |
| 7     | 122A    | GLY | 1.81            | 2.71            | 154.69         | ✗                 | ✗         | 4299<br>[O3]  | 1517 [O2]        |

**Table S5.**  $\pi$ -Stacking interactions of Amoradicin with the active site residues of TNF alpha.

| Index | Residue | AA  | Distance | Angle | Offset | Type | Ligand Atoms                       |
|-------|---------|-----|----------|-------|--------|------|------------------------------------|
| 1     | 59B     | TYR | 4.85     | 88.18 | 0.57   | T    | 4309, 4312, 4313, 4316, 4317, 4319 |
| 2     | 119A    | TYR | 5.03     | 75.92 | 1.33   | T    | 4301, 4303, 4304, 4306, 4307, 4308 |
